# Supplementary material for: Effects of Chemical Fertilization and Microbial Inoculum on Bacillus subtilis Colonization in Soybean and Maize Plants
Source: PubMed Central journal article supplement (PMC9298503; doi:10.3389/fmicb.2022.901157), 2022-07-06
Supplement: Image_1.pdf [file Image_1.pdf]

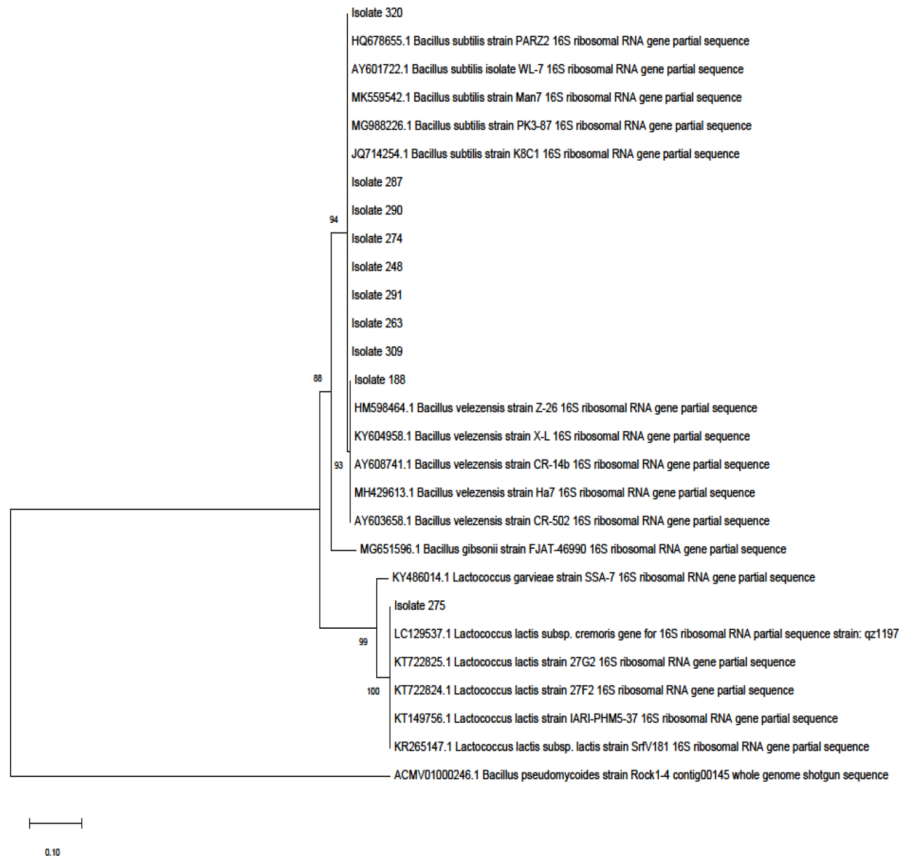

**S1** - Phylogenetic tree based on the nucleotide sequence of microorganisms obtained from the NCBI database (number of indicated accession), showing the phylogenetic relationship with the isolates *Bacillus subtilis* 290.
